# Supplementary material
Source: PubMed Central journal article supplement (PMC2846297)
Supplement: NIHMS162647-supplement-02.pdf [file NIHMS162647-supplement-02.pdf]

**Supplementary Table 1**

| <b>Peptide Sequence</b> | <b>Location in human Drebrin</b> |
|-------------------------|----------------------------------|
| EEELRK                  | 187-192                          |
| KEEELR                  | 186-191                          |
| QEQEER                  | 216-221                          |
| LSSPVLHR                | 140-147                          |
| MAPTPIPTR               | 328-336                          |
| EQFWEQAK                | 178-185                          |
| EQQIEEHR                | 229-236                          |
| EQSIFGDHR               | 253-261                          |
| EQFWEQAKK               | 178-186                          |
| EQQIEEHRR               | 229-237                          |
| KQQTLEAEEAK             | 238-248                          |
| QQTLEAEEAKR             | 239-249                          |
| EREQQIEEHR              | 227-236                          |
| EDENAEPVGTITYQK         | 152-165                          |
| YVLINWVGEDVPDAR         | 80-94                            |
| LREDENAEPVGTITYQK       | 150-165                          |
| SPSDSSTASTPVAEQIER      | 337-354                          |
| LAASGEGGLQELSGHFENQK    | 43-62                            |
| SESEVEEAAAIIAQRPDNPR    | 272-291                          |
| EESAADWALYTYEDGSDDLK    | 23-42                            |

**Supplementary Table 2**

| <b>Peptide Sequence</b> | <b>Location in human Drebrin</b> |
|-------------------------|----------------------------------|
| AGVSFSGHR               | 2-10                             |
| VMYGFCSVK               | 63-71                            |
| YVLINWVGEDVPDAR         | 80-94                            |
| LREDENAEPVGTTYQK        | 150-165                          |
| SPSDSSTASTPVAEQIER      | 337-354                          |
| SESEVEEAAIIAQRPDNPR     | 272-291                          |
| KSESEVEEAAIIAQRPDNPR    | 271-291                          |
